# Supplementary material for: Comparison of Hemodynamic and Cerebral Oxygenation Responses during Exercise between Normal-Weight and Overweight Men
Source: MDPI journal article supplement (doi:10.3390/healthcare11060923), 2023-03-22
Supplement: s1 [file s1]

Table S1. Cerebral oxygenation responses during 30-min continuous exercise and post-exercise period.

|                              | NW(n=18)        | OW (n=14)       | P      |
|------------------------------|-----------------|-----------------|--------|
| $\Delta O_2Hb$ ( $\mu mol$ ) |                 |                 |        |
| warm                         | 6.4 $\pm$ 6.4   | 5.4 $\pm$ 6.8   | 0.781  |
| Exercise10 min               | 22.7 $\pm$ 9.6  | 19.9 $\pm$ 11.7 | 0.628  |
| Exercise 20 min              | 27.2 $\pm$ 9.5  | 22.7 $\pm$ 13.9 | 0.481  |
| Exercise 30 min              | 27.6 $\pm$ 10.8 | 20.0 $\pm$ 18.1 | 0.346  |
| Cool down                    | 24.5 $\pm$ 8.2  | 17.1 $\pm$ 19.5 | 0.351  |
| Post10 min                   | 19.7 $\pm$ 7.0  | 5.8 $\pm$ 16.4  | 0.055  |
| Post20 min                   | 13.9 $\pm$ 7.0  | 1.0 $\pm$ 13.1  | 0.039* |
| Post30 min                   | 12.3 $\pm$ 8.7  | 0.60 $\pm$ 10.9 | 0.049* |
| $\Delta HHb$ ( $\mu mol$ )   |                 |                 |        |
| warm                         | 0.12 $\pm$ 1.6  | -0.23 $\pm$ 1.5 | 0.689  |
| Exercise10 min               | 2.1 $\pm$ 2.9   | 2.4 $\pm$ 2.0   | 0.829  |
| Exercise 20 min              | 5.0 $\pm$ 2.8   | 2.6 $\pm$ 3.3   | 0.176  |
| Exercise 30 min              | 5.6 $\pm$ 2.4   | 0.95 $\pm$ 5.9  | 0.065  |
| Cool down                    | 4.4 $\pm$ 2.5   | 0.19 $\pm$ 7.4  | 0.158  |
| Post10 min                   | 3.3 $\pm$ 4.0   | -3.4 $\pm$ 7.7  | 0.063  |
| Post20 min                   | 2.1 $\pm$ 3.6   | -3.3 $\pm$ 6.3  | 0.069  |
| Post30 min                   | 2.1 $\pm$ 2.8   | -3.0 $\pm$ 5.4  | 0.046* |

\* :  $p < 0.05$ , between group comparison

Table S2. Hemodynamics responses during 30-min continuous exercise and post-exercise period.

|                                | NW(n=18)  | OW (n=14) | P      |
|--------------------------------|-----------|-----------|--------|
| Stroke volume(ml/beat)         |           |           |        |
| Rest                           | 72.8±3.6  | 84.8±4.2  | 0.009* |
| Rest                           | 90.6±3.4  | 96.8±4.1  | 0.160  |
| Warm up                        | 104.3±4.0 | 107.7±4.7 | 0.375  |
| Exercise10 min                 | 108.1±4.0 | 110.4±4.8 | 0.661  |
| Exercise 20 min                | 112.1±4.2 | 115.9±4.9 | 0.681  |
| Exercise 30 min                | 92.4±4.1  | 97.6±4.1  | 0.404  |
| Cool down                      | 76.2±2.8  | 82.3±3.3  | 0.352  |
| Post10 min                     | 74.2±2.8  | 81.1±3.3  | 0.292  |
| Post20 min                     | 72.1±2.4  | 79.6±2.9  | 0.098  |
| Cardiac output(L)              |           |           |        |
| Rest                           | 5.4±0.37  | 7.7±0.45  | 0.009* |
| Warm up                        | 9.6±0.50  | 10.8±0.60 | 0.160  |
| Exercise10 min                 | 15.0±0.70 | 15.6±0.83 | 0.375  |
| Exercise 20 min                | 16.2±0.78 | 16.8±0.92 | 0.661  |
| Exercise 30 min                | 16.9±0.85 | 17.6±1.0  | 0.681  |
| Cool down                      | 10.9±0.77 | 12.4±0.91 | 0.404  |
| Post10 min                     | 7.1±0.44  | 8.1±0.51  | 0.352  |
| Post20 min                     | 6.3±0.39  | 7.6±0.46  | 0.392  |
| Post30 min                     | 5.8±0.35  | 7.3±0.42  | 0.098  |
| SVRi (d.s.cm <sup>-5</sup> /m) |           |           |        |
|                                | NW        | OW        | p      |
| Rest                           | 2395±485  | 2140±604  | 0.007* |
| Warm up                        | 1339±258  | 1489±291  | 0.717  |
| Exercise10 min                 | 843±138   | 1050±259  | 0.238  |
| Exercise 20 min                | 800±150   | 965±238   | 0.331  |
| Exercise 30 min                | 752±125   | 922±222   | 0.176  |
| Cool down                      | 1217±414  | 1330±330  | 0.795  |
| Post10 min                     | 1801±358  | 2030±352  | 0.564  |
| Post20 min                     | 2006±321  | 2158±475  | 0.702  |
| Post30 min                     | 2193±386  | 2205±475  | 0.145  |

\* :  $p < 0.05$ , between group comparison
